# Supplementary material for: Survey of programmatic experiences and challenges in delivery of hepatitis B and C testing in low- and middle-income countries
Source: Springer Nature journal article supplement (doi:10.1186/s12879-017-2767-0), 2017-11-01
Supplement: MOESM1 [file 15183170]

# FEASIBILITY SURVEY

The purpose of this brief questionnaire is to inform the forthcoming WHO hepatitis B and C testing guidelines meeting at the end of September and planned WHO testing guidelines.

We are seeking to gather experiences of hepatitis B and/or C testing from as many different settings and populations in low and middle income countries. The settings include primary care, antenatal clinics, drug dependency services, HIV clinics, and populations – MSMs, injecting drug users, prisoners, pregnant women, HIV positive persons.

The questionnaire has four main components:

PART A: Background demographics of interviewee

PART B: Details of programme, including xxxx

PART C: Protocol for hepatitis care and treatment

PART D: Summary of perceived barriers and challenges, and potential solutions/strategies

PART E: Provision of relevant epidemiological data

The questionnaire will be interviewer administered and take approximately 30 to 40 minutes to complete.

We appreciate your time to complete this survey.

## PART A - DETAIL OF INTERVIEW

### INTERVIEWER

Date of completion dd /mm / 2015  
Name of interviewer \_\_\_\_\_  
Contact (Tel, email) \_\_\_\_\_

### RESPONDANT

Name \_\_\_\_\_

#### Professional profile (tick all that apply)

Medical doctor /clinical officer   
Medical assistant   
Laboratory expert   
National program administrator   
Employee of an international organization (e.g., WHO)   
Researcher   
Employee/Consultant of a national or international NGO   
Primary care provider   
Programme implementer   
Policy maker   
Other

Contact (Tel, email) \_\_\_\_\_

Organisation \_\_\_\_\_

City \_\_\_\_\_

Country \_\_\_\_\_

Your role in hepatitis testing program \_\_\_\_\_

specify/give details , \_\_\_\_\_

#### Working experience in Hepatitis testing program

Less than 1 year   
1-2 years   
3-5 years   
5-10 years   
More than 10 years

## PART B - DETAILS OF PROGRAMME

### B1 GENERAL INFORMATION

B1.1 Do you do HCV, HBV, or both testing at your site?

Yes  HCV  HBV   
No

B1.2 Give a brief description of your programme:

*National context, date of beginning, principal and specific objectives, main activities*

B1.3 Country \_\_\_\_\_

B1.4 Site (tick all that apply)

National level   
Regional level (Province or State)   
Site-specific (only at the program you work)   
Other

specify/give details , \_\_\_\_\_

B1.5 How many site are you working for?

1   
2-5   
More than 5

B1.6 When did the testing activity start?

dd /mm / yyyy

**B2 DESCRIPTION OF HEPATITIS TESTING SERVICE**

**B2.1 Where is the testing is done?**  
(tick all that apply)

|                        | HCV                      | HBV                      |
|------------------------|--------------------------|--------------------------|
| Primary health care    | <input type="checkbox"/> | <input type="checkbox"/> |
| Obstetric service      | <input type="checkbox"/> | <input type="checkbox"/> |
| HIV service            | <input type="checkbox"/> | <input type="checkbox"/> |
| Harm reduction service | <input type="checkbox"/> | <input type="checkbox"/> |
| Outreach               | <input type="checkbox"/> | <input type="checkbox"/> |
| Prison                 | <input type="checkbox"/> | <input type="checkbox"/> |
| Hospital               | <input type="checkbox"/> | <input type="checkbox"/> |
| Specialized center     | <input type="checkbox"/> | <input type="checkbox"/> |
| Other                  | <input type="checkbox"/> | <input type="checkbox"/> |

specify/give details, \_\_\_\_\_

**B2.2 Who are the target populations for hepatitis screening in your programme?**

|                             | HCV                      | HBV                      |
|-----------------------------|--------------------------|--------------------------|
| General population          | <input type="checkbox"/> | <input type="checkbox"/> |
| Pregnant women              | <input type="checkbox"/> | <input type="checkbox"/> |
| Children                    | <input type="checkbox"/> | <input type="checkbox"/> |
| Person who have chronic ill | <input type="checkbox"/> | <input type="checkbox"/> |
| Blood donors                | <input type="checkbox"/> | <input type="checkbox"/> |
| Health care workers         | <input type="checkbox"/> | <input type="checkbox"/> |
| Migrant                     | <input type="checkbox"/> | <input type="checkbox"/> |
| Injecting drug user         | <input type="checkbox"/> | <input type="checkbox"/> |
| Sex worker                  | <input type="checkbox"/> | <input type="checkbox"/> |
| Men having sex with men     | <input type="checkbox"/> | <input type="checkbox"/> |
| Prisoners                   | <input type="checkbox"/> | <input type="checkbox"/> |
| HIV positive people         | <input type="checkbox"/> | <input type="checkbox"/> |
| Other                       | <input type="checkbox"/> | <input type="checkbox"/> |

specify/give details, \_\_\_\_\_

**B2.3 Is there integrated testing with other diseases?**

|             |                          |                             |
|-------------|--------------------------|-----------------------------|
| Yes for HCV | <input type="checkbox"/> | specify/give details, _____ |
| Yes for HBV | <input type="checkbox"/> | specify/give details, _____ |
| No          | <input type="checkbox"/> |                             |

**B2.4 Is there dual testing (HBV+HCV)**

|     |                          |
|-----|--------------------------|
| Yes | <input type="checkbox"/> |
| No  | <input type="checkbox"/> |

**B2.5 Specify / give details on indication/criteria for testing.**

*For instance:*

*First antenatal visit, ART initiation, immunization, secondary prevention, national policies, national treatment program community mobilization through demand creation etc.*

|     |                                                                         |
|-----|-------------------------------------------------------------------------|
| HCV | <div style="border: 1px solid black; height: 50px; width: 100%;"></div> |
| HBV | <div style="border: 1px solid black; height: 50px; width: 100%;"></div> |

**B2.6 What assays are used for HCV and HBV testing at your programme?**  
(tick all that apply)

|                                 | HCV                      | HBV                      |
|---------------------------------|--------------------------|--------------------------|
| RDT (rapid diagnostic test)     | <input type="checkbox"/> |                          |
| EIA (Enzyme immunoassay)        | <input type="checkbox"/> |                          |
| HCV core antigen test (HCV cAg) | <input type="checkbox"/> |                          |
| HCV RNA test                    | <input type="checkbox"/> |                          |
| Not sure                        | <input type="checkbox"/> |                          |
| RDT (rapid diagnostic test)     |                          | <input type="checkbox"/> |
| EIA (Enzyme immunoassay)        |                          | <input type="checkbox"/> |
| HBV DNA test                    |                          | <input type="checkbox"/> |
| Not sure                        |                          | <input type="checkbox"/> |

Please give details of the testing kit names  
\_\_\_\_\_  
\_\_\_\_\_  
\_\_\_\_\_

Please give details of the testing kit names  
\_\_\_\_\_  
\_\_\_\_\_

**B2.7 What testing algorithm is used at your programme?**

|                                       | HCV                      | HBV                      |
|---------------------------------------|--------------------------|--------------------------|
| One test strategy: RDT                | <input type="checkbox"/> |                          |
| One test strategy: EIA                | <input type="checkbox"/> |                          |
| One test strategy: HCV core Ag        | <input type="checkbox"/> |                          |
| One test strategy: HCV RNA            | <input type="checkbox"/> |                          |
| Two tests strategy: RDT/EIA + HCV cAg | <input type="checkbox"/> |                          |
| Two test strategy: RDT/EIA + HCV RNA  | <input type="checkbox"/> |                          |
| Others                                | <input type="checkbox"/> |                          |
| Not sure                              | <input type="checkbox"/> |                          |
| One test strategy: RDT                |                          | <input type="checkbox"/> |
| One test strategy: EIA                |                          | <input type="checkbox"/> |
| One test strategy: HBV DNA            |                          | <input type="checkbox"/> |
| Two test strategy: RDT/EIA + HBV DNA  |                          | <input type="checkbox"/> |
| Others                                |                          | <input type="checkbox"/> |
| Not sure                              |                          | <input type="checkbox"/> |

specify/give details, \_\_\_\_\_

specify/give details, \_\_\_\_\_

**B2.8 Which test is used for liver assessment?**

|                    | HCV                      | HBV                      |
|--------------------|--------------------------|--------------------------|
| Not routinely done | <input type="checkbox"/> | <input type="checkbox"/> |
| APRI               | <input type="checkbox"/> | <input type="checkbox"/> |
| Fib4               | <input type="checkbox"/> | <input type="checkbox"/> |
| Other biomarkers   | <input type="checkbox"/> | <input type="checkbox"/> |
| Fibro scan         | <input type="checkbox"/> | <input type="checkbox"/> |
| Liver biopsy       | <input type="checkbox"/> | <input type="checkbox"/> |

Specify other biomarkers

**B2.9 Who delivers the testing pathway?**  
(tick all that apply)

|                       | HCV                      | HBV                      |
|-----------------------|--------------------------|--------------------------|
| Counsellor            | <input type="checkbox"/> | <input type="checkbox"/> |
| Physician             | <input type="checkbox"/> | <input type="checkbox"/> |
| Laboratory technician | <input type="checkbox"/> | <input type="checkbox"/> |
| Nurse                 | <input type="checkbox"/> | <input type="checkbox"/> |
| Midwife               | <input type="checkbox"/> | <input type="checkbox"/> |
| Health care worker    | <input type="checkbox"/> | <input type="checkbox"/> |
| Other                 | <input type="checkbox"/> | <input type="checkbox"/> |

specify/give details, \_\_\_\_\_

**B2.10 Is the testing provider- or client-initiated?**

|                    | HCV                      | HBV                      |
|--------------------|--------------------------|--------------------------|
| Provider initiated | <input type="checkbox"/> | <input type="checkbox"/> |
| Client initiated   | <input type="checkbox"/> | <input type="checkbox"/> |

**B2.11.1 Which counselling and information is provided? (tick all that apply)**

|                       | HCV                      | HBV                      |
|-----------------------|--------------------------|--------------------------|
| No counselling        | <input type="checkbox"/> | <input type="checkbox"/> |
| Pre-test counselling  | <input type="checkbox"/> | <input type="checkbox"/> |
| Post-test counselling | <input type="checkbox"/> | <input type="checkbox"/> |
| Not Sure              | <input type="checkbox"/> | <input type="checkbox"/> |

If Counselling is provided, please answer the following question. If Not, please skip to B3

**B2.11.2. Is specific guidance/document available for the person in charge of testing?**

|     | HCV                      | HBV                      |
|-----|--------------------------|--------------------------|
| Yes | <input type="checkbox"/> | <input type="checkbox"/> |
| No  | <input type="checkbox"/> | <input type="checkbox"/> |

**B2.11.3 What training have these persons received**

Briefly describe here the modality of training (individual vs. collective - formal vs. mentoring - # of days)

**B3 COSTS, BUDGET AND FUNDING**

**B3.1 Who pays for testing?**

|                            | HCV                      | HBV                      |
|----------------------------|--------------------------|--------------------------|
| Patient (self-payment)     | <input type="checkbox"/> | <input type="checkbox"/> |
| Government (Public sector) | <input type="checkbox"/> | <input type="checkbox"/> |
| Private insurance          | <input type="checkbox"/> | <input type="checkbox"/> |
| NGO                        | <input type="checkbox"/> | <input type="checkbox"/> |
| Other                      | <input type="checkbox"/> | <input type="checkbox"/> |

specify/give details, \_\_\_\_\_

**B3.2.1 Do you have an allocated budget for this testing and/or treatment programme for HCV/HBV?**

|                   | HCV                      | HBV                      |
|-------------------|--------------------------|--------------------------|
| For testing Yes   | <input type="checkbox"/> | <input type="checkbox"/> |
| No                | <input type="checkbox"/> | <input type="checkbox"/> |
| For treatment Yes | <input type="checkbox"/> | <input type="checkbox"/> |
| No                | <input type="checkbox"/> | <input type="checkbox"/> |

If yes, please answer B3.2.2, if not please answer B3.2.3

**B3.2.2. What is the source of funding?**

|     |                                                            |
|-----|------------------------------------------------------------|
| HCV | <div style="border: 1px solid black; height: 70px;"></div> |
| HBV | <div style="border: 1px solid black; height: 70px;"></div> |

**B3.3 Please provide estimated costs per year for the following.**

If exact costs are unknown please provide estimates or proportions of overall costs

| HCV Testing |                 | Currency |
|-------------|-----------------|----------|
| Personnel   | Personnel costs |          |
|             | Training        |          |
| Capital     | Transport       |          |
|             | Equipment       |          |
|             | Infrastructure  |          |
| Recurrent   | Test kits       |          |
|             | Other           |          |

| HBV Testing |                 | Currency |
|-------------|-----------------|----------|
| Personnel   | Personnel costs |          |
|             | Training        |          |
| Capital     | Transport       |          |
|             | Equipment       |          |
|             | Infrastructure  |          |
| Recurrent   | Test kits       |          |
|             | Other           |          |

**PART C - FOLLOW UP AND LINKAGE TO CARE**

**C.1 What is the protocol for care and management in the following :**

**People HCV Ab positive  
(with or without RNA positive)**

|                            | Yes                      | No                       |
|----------------------------|--------------------------|--------------------------|
| Specific counselling       | <input type="checkbox"/> | <input type="checkbox"/> |
| Secondary investigations   | <input type="checkbox"/> | <input type="checkbox"/> |
| Specific medical follow up | <input type="checkbox"/> | <input type="checkbox"/> |
| ARV for those HIV+         | <input type="checkbox"/> | <input type="checkbox"/> |
| Treatment                  | <input type="checkbox"/> | <input type="checkbox"/> |
| Patients group             | <input type="checkbox"/> | <input type="checkbox"/> |
| Offer HBV test             | <input type="checkbox"/> | <input type="checkbox"/> |
| HBV immunization           | <input type="checkbox"/> | <input type="checkbox"/> |
| Other                      | <input type="checkbox"/> | <input type="checkbox"/> |

specify/give details, \_\_\_\_\_

Brief description (type of investigation or follow-up / setting / funding, etc.)

**People HCV Ab negative**

|                  | Yes                      | No                       |
|------------------|--------------------------|--------------------------|
| Offer HBV test   | <input type="checkbox"/> | <input type="checkbox"/> |
| HBV immunization | <input type="checkbox"/> | <input type="checkbox"/> |

Describe the conditions (setting, funding, etc.)

**People HB surface antigen (HBsAg) positive**

|                            | Yes                      | No                       |
|----------------------------|--------------------------|--------------------------|
| Specific counselling       | <input type="checkbox"/> | <input type="checkbox"/> |
| Secondary investigations   | <input type="checkbox"/> | <input type="checkbox"/> |
| Specific medical follow up | <input type="checkbox"/> | <input type="checkbox"/> |
| ARV for those HIV+         | <input type="checkbox"/> | <input type="checkbox"/> |
| Treatment                  | <input type="checkbox"/> | <input type="checkbox"/> |
| Patients group             | <input type="checkbox"/> | <input type="checkbox"/> |
| Other                      | <input type="checkbox"/> | <input type="checkbox"/> |

specify/give details, \_\_\_\_\_

Brief description (type of investigation or follow-up / setting / funding, etc.)

**People HBsAg Negative**

|                        | Yes                      | No                       |
|------------------------|--------------------------|--------------------------|
| Offer HBV immunization | <input type="checkbox"/> | <input type="checkbox"/> |

Describe the conditions (setting, funding, etc.)

**C.2 Where is treatment provided?**

|                        |                          |
|------------------------|--------------------------|
| Same site              | <input type="checkbox"/> |
| Different site         | <input type="checkbox"/> |
| Treatnet not available | <input type="checkbox"/> |

specify/give details, \_\_\_\_\_

**C.3 How are you approaching testing in the absence of treatment?**
